# Supplementary material
Source: publisher figshare collection journal article supplement (https://geolsoc.figshare.com/ndownloader/files/5424230)
Supplement: Supplementary file 1 [file 5424230]

	3300	2925	1710	1600	1510
A.trid.HA10	0.016	0.021	0.082	0.03	0.016
A.trid.u	0.02	0.029	0.004	0.025	0.025
B.font.HA10	0.019	0.015	0.053	0.036	0.021
B.font.u	0.037	0.061	0.026	0.058	0.063
I.xant.HA10	0.007	0.011	0.053	0.016	0.009
I.xant.u	0.038	0.05	0.012	0.049	0.047
J.nigr.HA10	0.013	0.018	0.073	0.027	0.014
J.nigr.u	0.074	0.141	0.057	0.101	0.095
K.scop.HA10	0.02	0.014	0.047	0.031	0.013
K.scop.u	0.039	0.066	0.032	0.07	0.056
P.trem.HA10	0.014	0.016	0.058	0.026	0.014
P.trem.u	0.027	0.03	0.008	0.04	0.03
S.cera.HA10	0.016	0.017	0.065	0.03	0.014
S.cera.u	0.043	0.066	0.036	0.074	0.052
S.hale.HA10	0.015	0.017	0.058	0.024	0.01
S.hale.u	0.014	0.019	0.008	0.02	0.017
U-1	0.035	0.159	0.099	0.052	0.06
U-2	0.03	0.155	0.093	0.045	0.052
U-3	0.021	0.13	0.074	0.032	0.037
U-4	0.032	0.155	0.095	0.047	0.055
U-5	0.03	0.145	0.089	0.044	0.051
U-6	0.035	0.157	0.1	0.052	0.061
HA-10-1	0.051	0.07	0.113	0.053	0.04
HA-10-2	0.021	0.027	0.048	0.026	0.021
HA-10-3	0.021	0.029	0.047	0.027	0.022
HA-10-4	0.021	0.026	0.052	0.028	0.023
HA-10-5	0.013	0.018	0.032	0.018	0.015
HA-10-6	0.061	0.07	0.131	0.064	0.04
